# Supplementary material for: A new type of polyhedron-based metal–organic frameworks with interpenetrating cationic and anionic nets demonstrating ion exchange, adsorption and luminescent properties
Source: Royal Society of Chemistry journal article supplement (doi:10.1039/c1cc00047k), 2011-01-01
Supplement: c1cc00047k.pdf [file c1cc00047k.pdf]

## *Supporting Information*

### **A New Type of Polyhedron-based Metal-Organic Frameworks with Interpenetrating Cationic and Anionic Nets Demonstrating Ion Exchange, Adsorption and Luminescent Properties**

*Zhen-Jie Zhang, Wei Shi\*, Zheng Niu, Huan-Huan Li, Bin Zhao,  
Peng Cheng\*, Dai-Zheng Liao, and Shi-Ping Yan*

#### **Experiment**

**Materials and Methods:** All reagents were commercially available and were used without further purification. Elemental analyses (C, H and N) were performed on a Perkin-Elmer 240 CHN elemental analyzer. IR spectra were recorded in the range of 400-4000  $\text{cm}^{-1}$  on a Bruker TENOR 27 spectrophotometer using a KBr pellet. Powder X-ray diffraction measurements were recorded on a D/Max-2500 X-ray diffractometer using Cu  $K\alpha$  radiation. The fluorescent spectra were measured on a Varian Cary Eclipse Fluorescence spectrophotometer. Thermal analyses ( $\text{N}_2$  atmosphere, heating rate of 1.5  $^\circ\text{C}/\text{min}$ ) were carried out in a Labsys NETZSCH TG 209 Setaram apparatus. Atomic Sorption was performed by Polarized Zeeman Atomic Absorption Spectrophotometer (HITACHI-180-80). Energy dispersive X-ray spectroscopy (EDS) was measured on a JEOL-7500F Microscope equipped with an energy-dispersive spectroscopy (EDS) instrument. ICP was measured by ICP-9000(N+M) (USA Thermo Jarrell-Ash Corp).

**Synthesis of N-phenyl-N'-phenyl bicyclo[2,2,2]oct-7-ene-2,3,5,6-tetracarbox-diimide tetracarboxylic acid (L1):** A mixture of 20 mmol (3.62 g) of

5-Aminoisophthalic acid and 10 mmol (2.48 g) bicyclo[2.2.2]oct-7-ene-2,3,5,6-tetracarboxylic acid dianhydride was added to 100 mL acetic acid. Then the solution was heated to reflux for 12 h. White power was filtrated and washed twice with water. **L1** was used without further purification. IR (KBr) for **L1**: 3460(*s, b*), 1719(*s*), 1609(*w*), 1459(*m*), 1383(*s*), 1308(*w*), 1274(*m*), 1190(*s*), 1118(*w*), 1083(*w*), 1048(*w*), 948(*w*), 793(*m*), 758(*m*), 682(*m*), 622(*w*), 527(*w*), 497(*w*), 442(*w*)  $\text{cm}^{-1}$ .

**Synthesis of N-phenyl-N'-phenyl bicyclo[2,2,2]oct-7-ene-2,3,5,6-tetracarbox-diimide dicarboxylic acid (L2):** A mixture of 20 mmol (2.74 g) of 3-Aminobenzoic acid and 10 mmol (2.48 g) bicyclo[2.2.2]oct-7-ene-2,3,5,6-tetracarboxylic acid dianhydride was added in 100 mL acetic acid. Then, the solution was heated to reflux for 12 h. White power was filtrated and washed twice with water. **L2** was used without further purification. IR (KBr) for **L2**: 3470(*s, b*), 2980(*s*), 2676(*s*), 2558(*s*), 1784(*m*), 1717(*s*), 1594(*m*), 1499(*m*), 1456(*s*), 1419(*m*), 1378(*s*), 1308(*s*), 1238(*w*), 1188(*s*), 1083(*m*), 937(*m*), 795(*s*), 757(*s*), 682(*s*), 627(*w*), 592(*w*), 507(*w*), 472(*w*), 422(*w*)  $\text{cm}^{-1}$ .

**Synthesis of 1:** A mixture of L1 (0.054 g, 0.1 mmol) and  $\text{ZnCl}_2$  (0.044 g, 0.33 mmol) was added into a mixed solution of 5 mL DMF, 6 mL methanol and 0.5 mL water, placed into a 25 mL Teflon-lined Parr, and incubated at room temperature for 1 months. The block-like colorless crystals of **1** were obtained in a 30% yield (based on Zn). Formula,  $\text{C}_{3792}\text{H}_{5232}\text{N}_{560}\text{Zn}_{192}\text{O}_{2096}$ . Element analysis (%) found (calcd.), C 43.10 (43.47), H 5.23 (5.03), and N 7.55 (7.48). IR (KBr) for **1**: 3478(*s, b*), 2928(*w*), 2359(*s*), 1715(*s*), 1654(*s*), 1574(*m*), 1594(*m*), 1379(*s*), 1456(*s*), 1233(*m*), 1198(*m*), 1103(*w*), 1008(*w*), 918(*w*), 848(*w*), 775(*m*), 723(*w*), 687(*m*), 618(*w*), 527(*w*), 457(*w*)  $\text{cm}^{-1}$ .

**Synthesis of 2:** A mixture of L2 (0.049 g, 0.1 mmol) and  $\text{CuCl}_2 \cdot 2\text{H}_2\text{O}$  (0.042 g, 0.25 mmol) was added into a mixed solution of 5 mL DMA, placed a 25 mL Teflon-lined

Parr, heated to 80 °C for 3 days, and then cooled to room temperature for 2 days. The prism-like blue crystals of **2** were obtained in a 50% yield (based on Cu). Formula, C<sub>144</sub>H<sub>170</sub>N<sub>18</sub>Cu<sub>4</sub>O<sub>50</sub>. Element analysis (%) found (calcd.), C 53.70 (53.93), H 5.14 (5.34), and N 8.09 (7.86). IR (KBr) for **2**: 3462(*s, b*), 2938(*s*), 1775(*m*), 1714(*s*), 1606(*s*), 1510(*m*), 1447(*m*), 1400(*s*), 1196(*s*), 1021(*m*), 763(*s*), 692(*w*), 600(*w*) cm<sup>-1</sup>.

**X-ray Structure Determination:** All crystallographic data were collected with a Supernova Single Crystal Diffractometer, which was equipped with graphite monochromatic Mo K $\alpha$  radiation ( $\lambda = 0.71073$  Å). Structures were solved by direct methods with the SHELXTL-97 program and refined by full-matrix least-squares techniques against  $F^2$  with the SHELXTL-97 program package. All non-hydrogen atoms were refined anisotropically, and hydrogen atoms were located and refined isotropically. The contribution of disordered solvent molecules was treated as a diffuse using the Squeeze procedure in Platon. The resulting new HKL4 files were used to further refine the structures.

**Crystal data for 1:**  $M_r = 71922.72$ , cubic,  $Fm-3c$ ,  $a = 63.0890(3)$  Å,  $V = 251108(2)$  Å<sup>3</sup>,  $Z = 2$ ,  $D_c = 0.951$  g/cm<sup>3</sup>,  $\mu = 0.961$  mm<sup>-1</sup>, GOF = 1.032,  $R_{int} = 0.0310$ , final  $R$  indicates ( $I > 2\sigma(I)$ ):  $R_1 = 0.0582$ ,  $wR_2 = 0.2119$ . CCDC: 752311. For **2**,  $M_r = 2403.62$ , triclinic,  $P2_1/c$ ,  $a = 19.9699(19)$  Å,  $b = 17.0730(15)$  Å,  $c = 30.915(2)$  Å,  $\alpha = \gamma = 90^\circ$ ,  $\beta = 126.461(4)^\circ$ ,  $V = 8477.2(12)$  Å<sup>3</sup>,  $Z = 2$ ,  $D_c = 0.942$  g/cm<sup>3</sup>,  $\mu = 0.553$  mm<sup>-1</sup>, GOF = 0.966,  $R_{int} = 0.0324$ , final  $R$  indicates ( $I > 2\sigma(I)$ ):  $R_1 = 0.0688$ ,  $wR_2 = 0.1991$ . CCDC: 752313. Copies of the data can be obtained, free of charge, on application to the CCDC, 12 Union Road, Cambridge CB2 1EZ UK (Fax 44 (1223) 336 033; e-mail: [deposit@ccdc.cam.ac.uk](mailto:deposit@ccdc.cam.ac.uk)).

**Adsorption and desorption of I<sub>2</sub> experiment:** In the adsorption experimental process, the crystals of **1** were initially immersed in 5 mL methanol solution of I<sub>2</sub> (0.1 M/L) in a small sealed flask at room temperature. During the process, the methanol

solution of I<sub>2</sub> was refreshed every 6 h. After 12 and 24 h, respectively, the products were filtered and washed with sufficient methanol for four times. The products of I<sub>2</sub>-**1** were finally immersed into fresh methanol for convenient observation and removing surface absorption.

In the desorption experimental process, the dark brown crystals of **2.65I<sub>2</sub>-1** were immersed in 5 mL fresh methanol solution in a small sealed flask at room temperature. During the process, the methanol solution was refreshed every 6 h. After 24 and 48 h respectively, the products were filtered and washed with sufficient methanol four times. The products of I<sub>2</sub>-**1** were immersed into fresh methanol for convenient observation and removing surface absorption.

**BET research:** The BET researches of **1** and **Cu-1** were performed on a Quantachrome IQ2 automatic volumetric instrument. The surface area of **1** can not be obtained because the framework of **1** may collapse during the guest-removal process. Fortunately, the surface area (BET) of **Cu-1** was obtained as 373 m<sup>2</sup>g<sup>-1</sup> and the N<sub>2</sub> adsorption isotherm for **Cu-1** at 77 K is shown in Figure S12. This result is significantly lower than the surface area theoretically obtainable, however the TGA and I<sub>2</sub>-loaded experiments indicate that the interior is accessible to guest molecules.

### Supporting Scheme, Figures and Tables

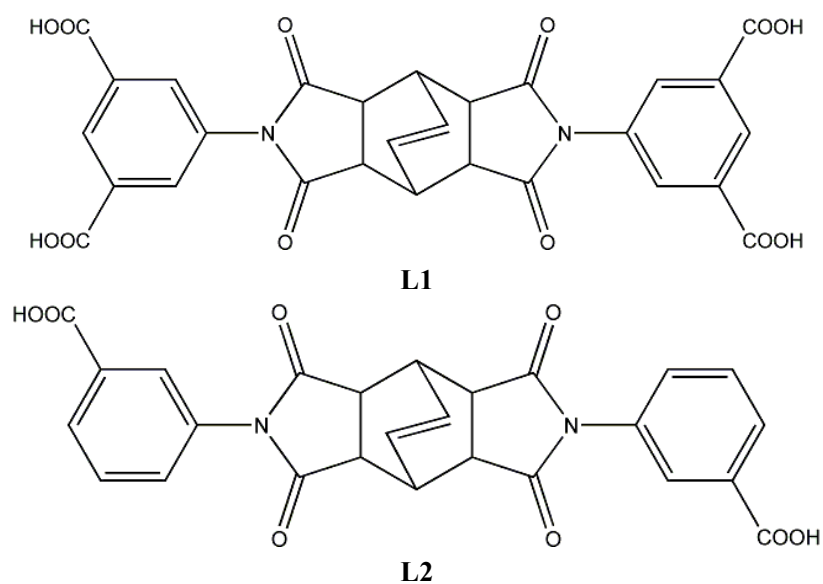

**Scheme S1.** Structures of ditopic ligands.

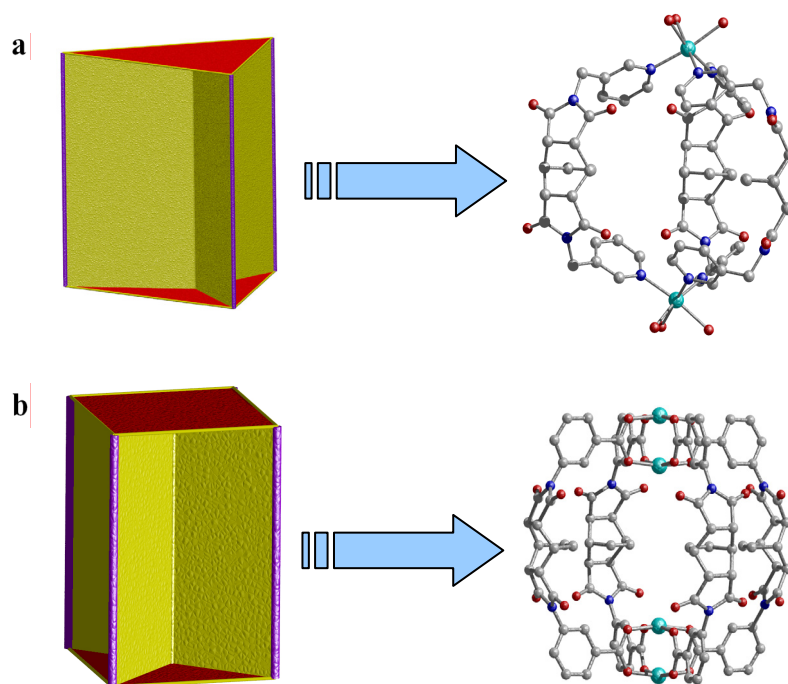

**Figure S1.** Two types of MOCs, trigonal(a) and tetragonal(b) prisms of regular faces (square or triangle) in red, pillars in purple and open windows in yellow.

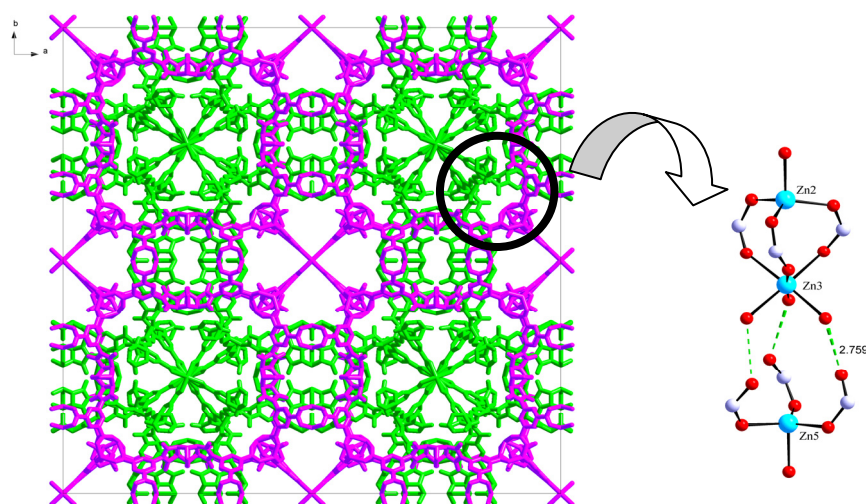

**Figure S2.** (Left) Composition of one unit cell of **1**; (Right) two kinds of triangle paddlewheels linked with hydrogen-bonding interactions ( $[\text{Zn}_2(\text{CO}_2)_3]^+$  for MOP-A<sup>+</sup> and  $[\text{Zn}(\text{CO}_2)_3]$  for MOP-B<sup>-</sup>). The overall structure is neutral and sustained via the hydrogen-bonding interactions (2.759 Å) as well as electrostatic interactions between  $[\text{Zn}_2(\text{CO}_2)_3]^+$  and  $[\text{Zn}(\text{CO}_2)_3]$ .

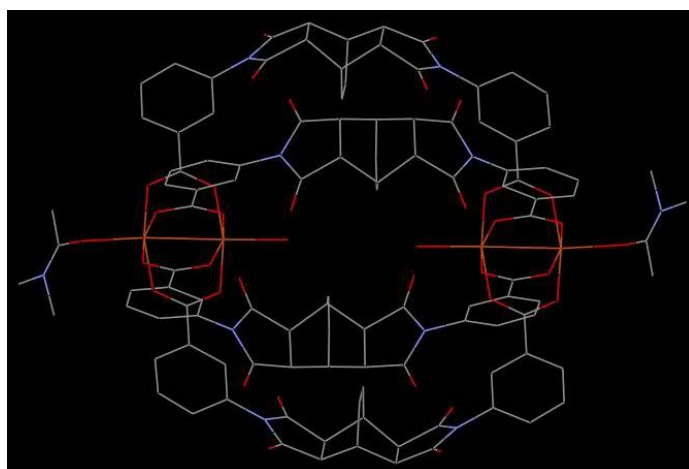

**Figure S3.** Crystal structure of **2**.

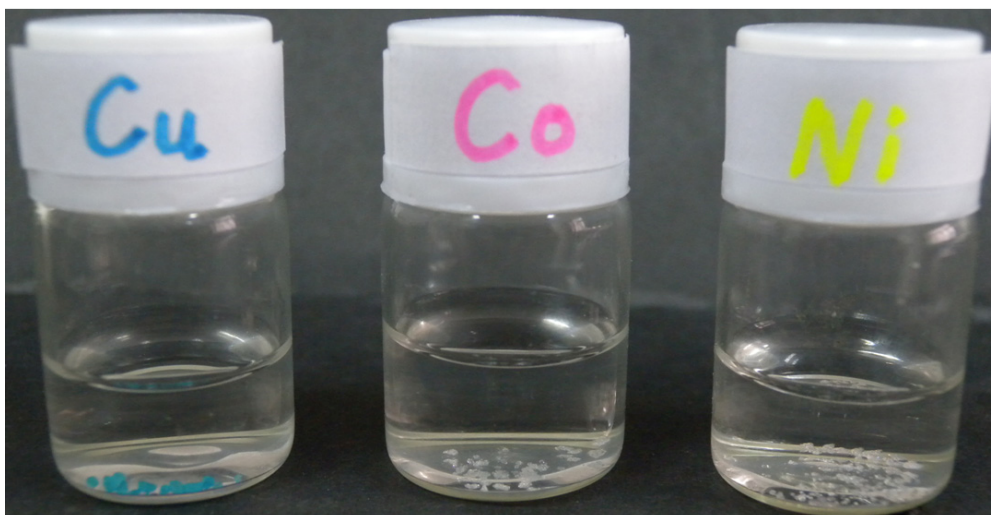

**Figure S4.** Crystal pictures of  $\text{Cu}^{2+}$ -exchanged,  $\text{Co}^{2+}$ -exchanged and  $\text{Ni}^{2+}$ -exchanged products. Initially, the crystals of **1** were immersed in methanol solutions of  $\text{CuCl}_2$ ,  $\text{CoCl}_2$  and  $\text{NiCl}_2$  (0.5 mmol/mL), respectively. During 1 week, the methanol solutions of metal ions were refreshed four times. Then the immersed crystals were filtered and washed with sufficient methanol. **The final ion-exchanged crystals were immersed in fresh methanol for convenient observation and removing surface absorption.**

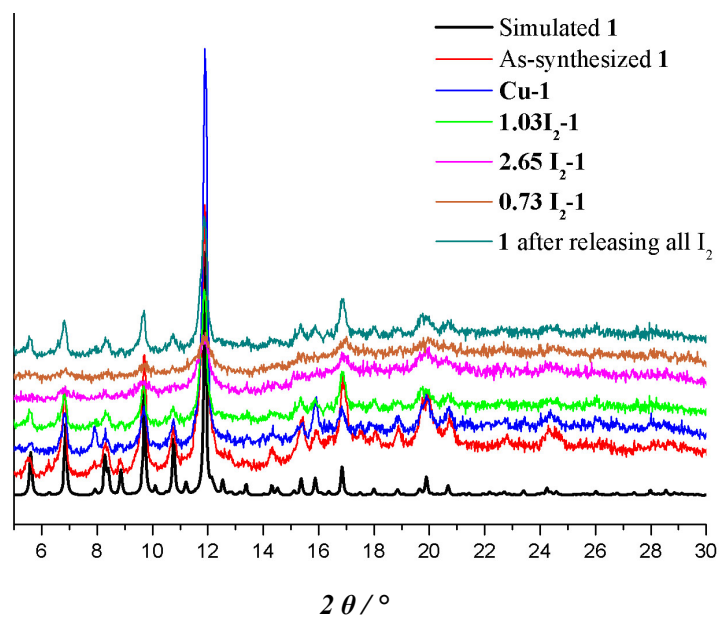

**Figure S5.** X-Ray powder diffraction patterns of **1** with I<sub>2</sub>, Cu-1, as-synthesized and simulated samples.

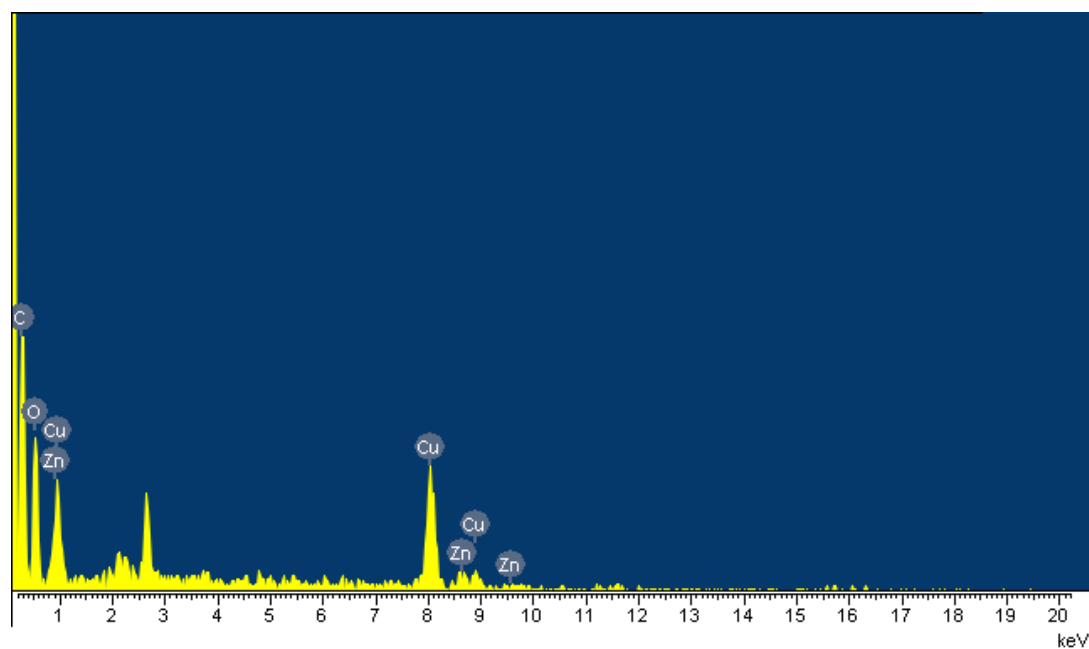

**Figure S6.** Energy dispersive X-ray spectroscopy. The Peak of 2.641 keV of Cl<sup>-</sup> has been omitted for calculation.

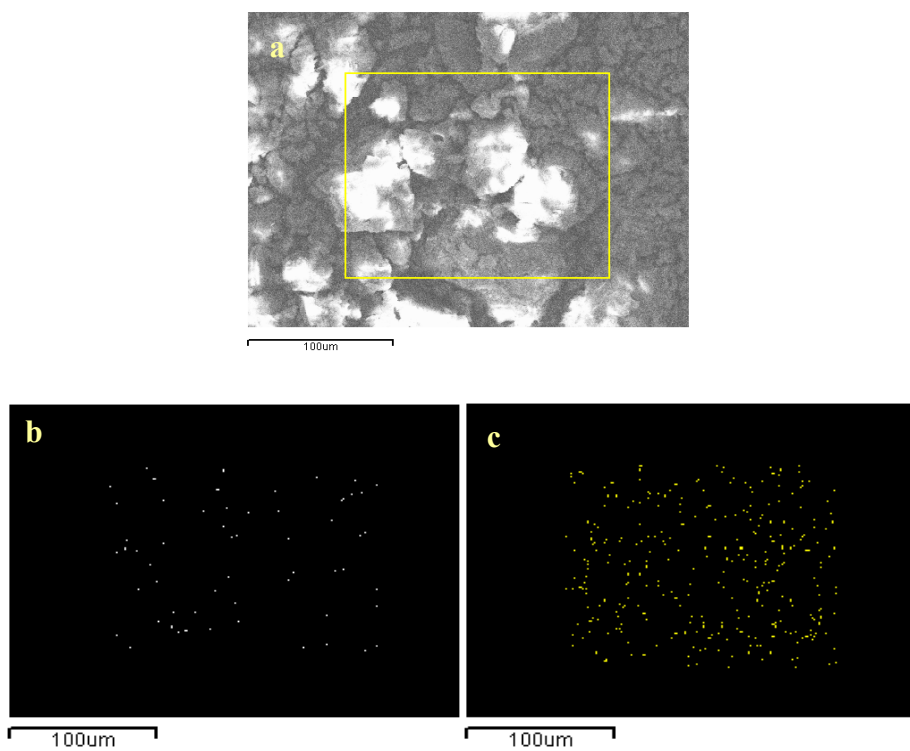

**Figure S7.** (a) FT-SEM micrograph of Cu (II)-exchanged product; (b) EDS maps for Zn; and (c) EDS maps for Cu.

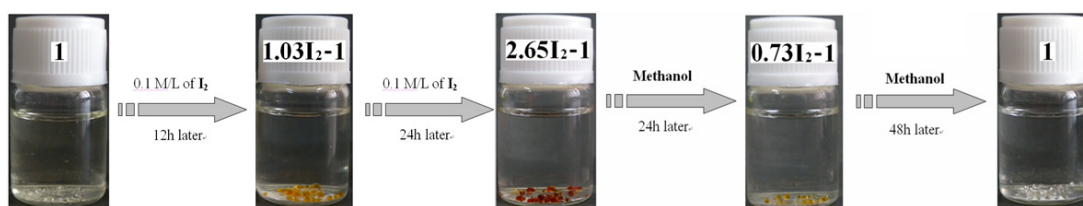

**Figure S8.** Adsorption and desorption photographs of **1** with I<sub>2</sub>.



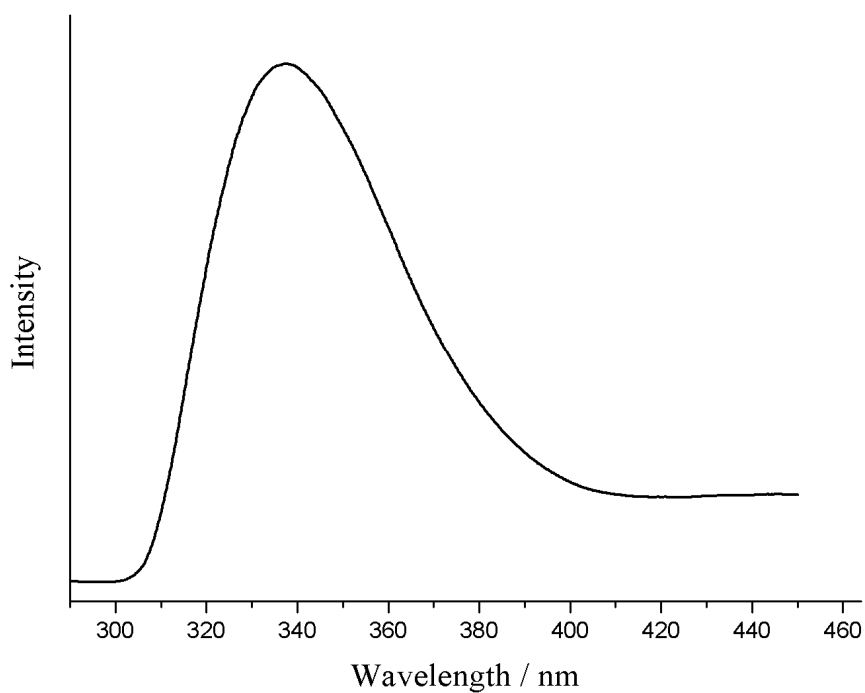

**Figure S9.** Solid-state fluorescence of ligand **L1** excited at 280 nm.

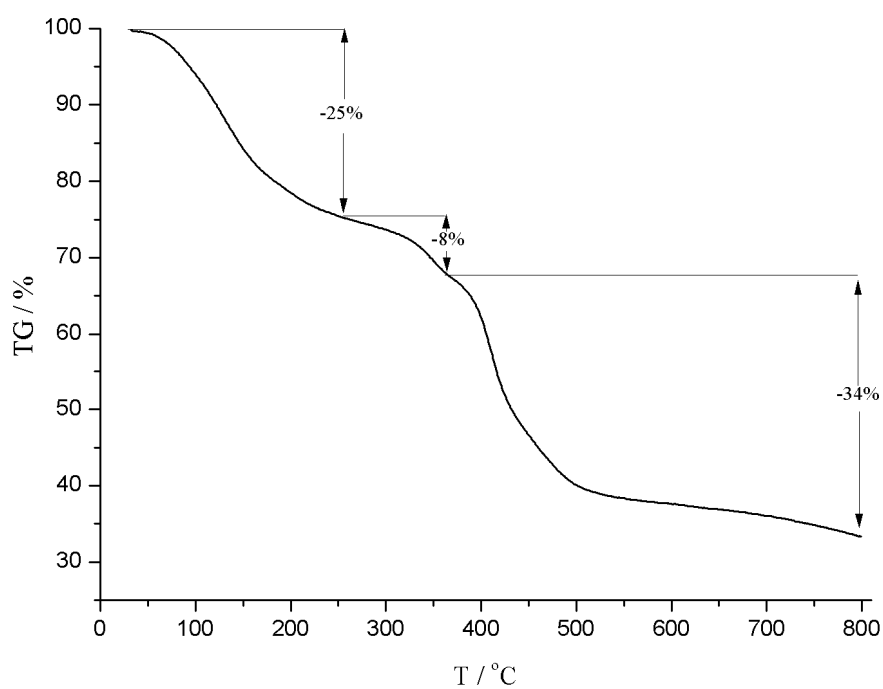

**Figure S10.** TGA curve for **1**. The sample was heated to 800 °C at a heating rate of 1.5 °C/min.

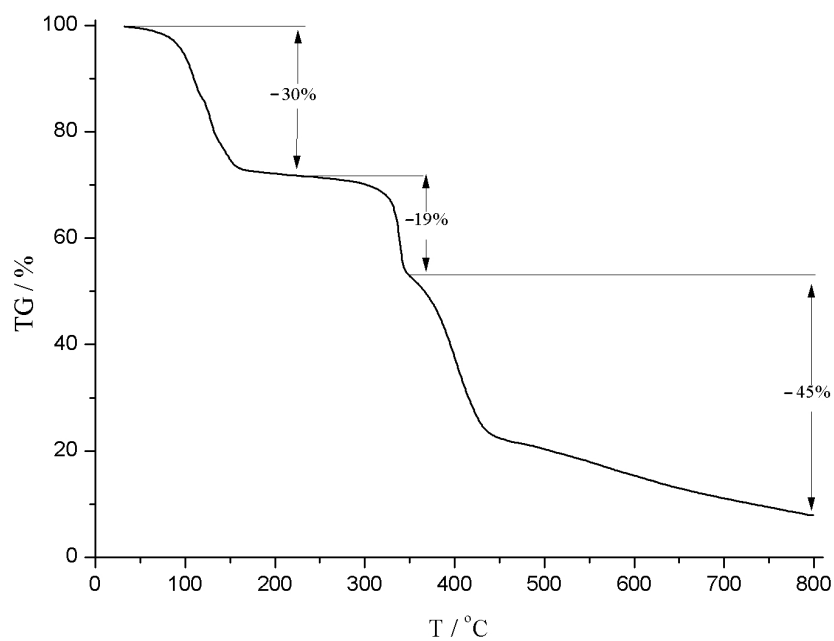

**Figure S11.** TGA curve for **2**. The sample was heated to 800 °C at a heating rate of 1.5 °C/min.

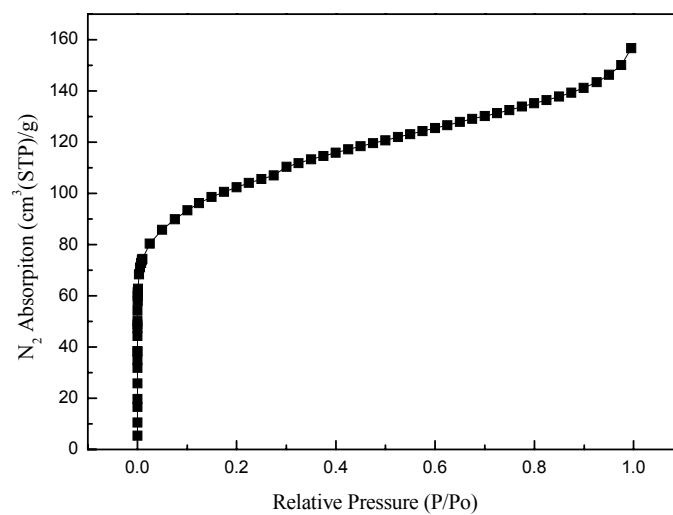

**Figure S12.** N<sub>2</sub> adsorption isotherm for **Cu-1** at 77 K.

**Table S1.** Metal ion analysis for compound Cu<sup>II</sup>-exchanged product.

| sample                                            | ICP                      | EDS                      | Atomic Sorption         |
|---------------------------------------------------|--------------------------|--------------------------|-------------------------|
| Cu <sup>II</sup> -exchanged product               | Cu 86.38 %<br>Zn 13.62 % | Cu 86.14 %<br>Zn 13.86 % | Cu 87.52%<br>Zn 12.48 % |
| Cu <sup>II</sup> -exchanged solution <sup>a</sup> | Cu 84.73 %<br>Zn 78.41 % |                          |                         |
| Co <sup>II</sup> -exchanged product               | no Co                    | no Co                    | no Co                   |
| Ni <sup>II</sup> -exchanged product               | no Ni                    | no Ni                    | no Ni                   |

<sup>a</sup> The content of DMF in this solution was measured on Shimadzu GC-9A instrument and ~3.36% DMF was detected.

**Table S2.** ICP-MS analysis for the products absorbing and releasing I<sub>2</sub>.

| ICP-MS                          | 1.03 I <sub>2</sub> -1 | 2.65 I <sub>2</sub> -1 | 0.73I <sub>2</sub> -1 | 1-After releasing all I <sub>2</sub> |
|---------------------------------|------------------------|------------------------|-----------------------|--------------------------------------|
| Concentration of I<br>(mg / L)  | 0.035                  | 0.124                  | 0.022                 | no I monitored                       |
| Concentration of Zn<br>(mg / L) | 3.35                   | 4.65                   | 2.96                  |                                      |
